# Supplementary material for: Incidence of Guillain-Barré Syndrome Is Not Associated with Influenza Vaccination in the Elderly
Source: PubMed Central journal article supplement (PMC7563234; doi:10.3390/vaccines8030431), 2020-07-31
Supplement: vaccines-08-00431-s001.pdf [file vaccines-08-00431-s001.pdf]

## Supplemental Materials

**Supplemental Table 1.** Precedent infections considered possible causes of Guillain-Barré syndrome

| Precedent Infections   | ICD-10 <sup>th</sup> -codes                       |
|------------------------|---------------------------------------------------|
| Upper respiratory      | J00-J06, J20-J22, J40-42, H65-67                  |
| Lower respiratory      | J440                                              |
| Gastro-intestinal      | A08-A09                                           |
| Malaria                | B50-B54, N080, P373, P374, T372, T378, Y412, Y418 |
| Tsutsugamushi          | A753                                              |
| Other viruses          | A92                                               |
| Campylobacter          | A045                                              |
| Cytomegalovirus        | B25                                               |
| Epstein-Barr virus     | B27                                               |
| Herpes simplex virus   | B00                                               |
| Varicella (Chickenpox) | B01                                               |
| Herpes zoster virus    | B02                                               |
| Mycoplasma             | A493, B96, J29                                    |
| Haemophilus influenzae | G00, J09-J18                                      |
| Influenza virus        | A413, A492, J201                                  |
| Parainfluenza virus    | J204, J2181                                       |
| Other infections       | B96, A045, P236                                   |

**Supplemental Table 2.** Results of conditional Poisson regression analysis by sex and age: subgroup analyses

| Risk period (days)                                                      | Male<br>(n = 168) |             |             | Female<br>(n = 152) |             |             | 65 – 74 years<br>(n = 175) |             |             | 75 – 84 years<br>(n = 128) |             |             |
|-------------------------------------------------------------------------|-------------------|-------------|-------------|---------------------|-------------|-------------|----------------------------|-------------|-------------|----------------------------|-------------|-------------|
|                                                                         | IRR               | 95% CI      |             | IRR                 | 95% CI      |             | IRR                        | 95% CI      |             | IRR                        | 95% CI      |             |
|                                                                         |                   | Lower limit | Upper limit |                     | Lower limit | Upper limit |                            | Lower limit | Upper limit |                            | Lower limit | Upper limit |
| Baseline (Before influenza vaccination or after vaccination of 90 days) | 1.00              | -           | -           | 1.00                | -           | -           | 1.00                       | -           | -           | 1.00                       | -           | -           |
| 0-3                                                                     | -                 | -           | -           | -                   | -           | -           | -                          | -           | -           | -                          | -           | -           |
| 4-7                                                                     | 0.51              | 0.07        | 3.67        | 1.19                | 0.29        | 4.80        | 0.53                       | 0.07        | 3.75        | 0.66                       | 0.09        | 4.74        |
| 8-14                                                                    | 0.88              | 0.28        | 2.76        | 1.02                | 0.32        | 3.20        | 0.60                       | 0.15        | 2.42        | 1.51                       | 0.56        | 4.10        |
| 15-42                                                                   | 0.95              | 0.54        | 1.68        | 0.76                | 0.39        | 1.50        | 1.05                       | 0.60        | 1.82        | 0.76                       | 0.37        | 1.55        |
| 43-90                                                                   | 0.73              | 0.44        | 1.20        | 1.09                | 0.69        | 1.71        | 1.18                       | 0.78        | 1.79        | 0.61                       | 0.33        | 1.13        |

(CI, confidence interval; IRR, incidence rate ratio)
